# Supplementary material
Source: PubMed Central journal article supplement (PMC7611120)
Supplement: EMS127535-supplement-Supplementary_material.pdf [file EMS127535-supplement-Supplementary_material.pdf]

SUPPLEMENTAL MATERIAL

Figure I: Participant selection from the EPIC-Norfolk study.

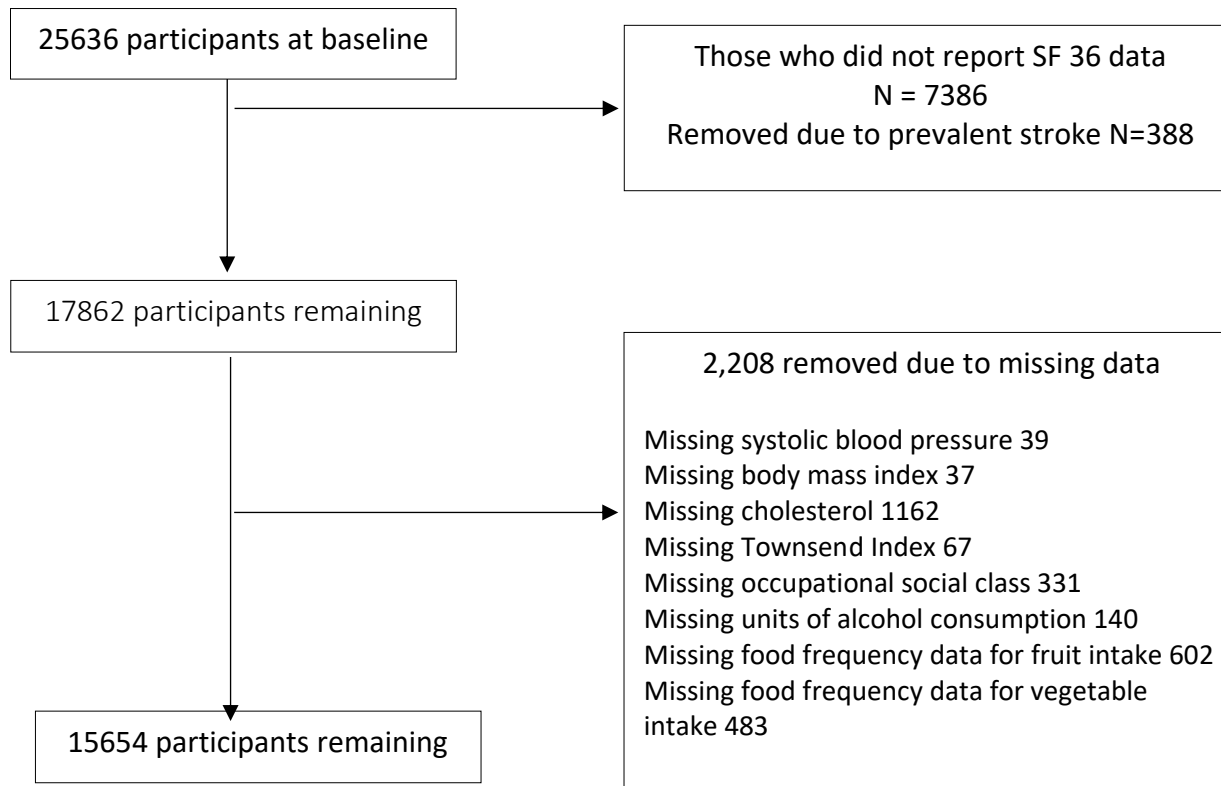

Table I: Baseline characteristics comparison between the included and excluded sample in the EPIC Norfolk study.

|                                           | Included N (%) total | Excluded N (%) total |
|-------------------------------------------|----------------------|----------------------|
| Total N (%)                               | 15654                | 9711                 |
| Age (Years) mean (SD)                     | 59.07 (9.14)         | 59.43 (9.59)         |
| Sex                                       |                      |                      |
| Male N (%)                                | 6906 (44.12)         | 4699 (47.09)         |
| Female N (%)                              | 8748 (55.88)         | 5280 (52.91)         |
| Body Mass Index (kg/m <sup>2</sup> )      |                      |                      |
| < 18.5                                    | 74 (0.47)            | 50 (0.5)             |
| 18.5 – 24.9                               | 6390 (40.82)         | 3554 (35.6)          |
| 25.0 – 30.0                               | 7041 (44.98)         | 4557 (45.7)          |
| Over 30.0                                 | 2149 (13.73)         | 1761 (17.6)          |
| Systolic BP (mmHg) mean (SD)              | 134.99 (18.13)       | 136.11 (18.57)       |
| Serum cholesterol (mmol/l) mean (SD)      | 6.17 (1.16)          | 6.20 (1.19)          |
| Diabetes Mellitus (self reported)         | 312 (1.99)           | 275 (2.75)           |
| Use of antidepressant drugs               | 740 (4.73)           | 679 (6.80)           |
| Myocardial Infarction (self reported)     | 441 (2.82)           | 366 (3.67)           |
| Cancer (self reported)                    | 855 (5.46)           | 555 (5.56)           |
| COPD (self reported)                      | 1389 (8.87)          | 976 (9.78)           |
| Fruit intake g/day median (IQR*)          | 216.32 (192.90)      | 202.80 (197.42)      |
| Vegetable intake g/day median (IQR*)      | 225.44 (145.41)      | 220.73 (148.59)      |
| Alcohol consumption (g/day) median (IQR)* | 4.00 (9.00)          | 3.00 (9.00)          |
| Smoking Status(self reported)             |                      |                      |
| Current                                   | 1647 (10.52)         | 1556 (15.59)         |
| Former                                    | 6537 (41.76)         | 4223 (42.32)         |
| Never                                     | 7470 (47.72)         | 4200 (42.09)         |
| Physical Activity(self reported)          |                      |                      |
| Inactive                                  | 4305 (27.50)         | 3557 (35.64)         |
| Moderately Inactive                       | 4608 (29.44)         | 4200 (27.47)         |

|                                       |                |                |
|---------------------------------------|----------------|----------------|
| Moderately Active                     | 3740 (23.89)   | 2035 (20.39)   |
| Active                                | 3001 (19.17)   | 1645 (16.48)   |
| Townsend score median (IQR)           | -2.65 (2.5)    | -2.54 (2.23)   |
| Townsend Score quintiles              |                |                |
| I (-7- -3.81)                         | 3192 (20.39)   | 1789 (17.92)   |
| II (-3.82 - -2.96)                    | 3094 (19.76)   | 1880 (18.84)   |
| III (-2.97 - -2.15)                   | 3129 (19.99)   | 1975 (19.79)   |
| IV (-2.16 - -0.79)                    | 3117 (19.91)   | 1932 (19.36)   |
| V (-0.80-7.0)                         | 3122 (19.94)   | 2301 (23.06)   |
| Social Class                          |                |                |
| Professional                          | 1175 (7.51)    | 578 (5.79)     |
| Managerial                            | 5975 (38.17)   | 3181 (31.88)   |
| Skilled non-manual                    | 2660 (16.99)   | 1478 (14.81)   |
| Skilled manual                        | 3406 (21.76)   | 2365 (23.70)   |
| Semi-skilled manual                   | 1953 (12.48)   | 1407 (14.10)   |
| Non-skilled                           | 485 (3.10)     | 400 (4.01)     |
| Educational Attainment                |                |                |
| Degree or Higher                      | 2160 (13.80)   | 4131 (41.40)   |
| A-Level                               | 6483 (41.41)   | 931 (9.33)     |
| O-Level                               | 1691 (10.80)   | 3771 (37.79)   |
| No Qualification                      | 5320 (33.98)   | 1128 (11.30)   |
| Vitamin use                           | 6919 (44.20)   | 3880 (38.88)   |
| SF36 Physical function * median (IQR) | 85.00 (25.00)  | 80.50 (35.00)  |
| SF36 Role physical* median (IQR)      | 100.00 (50.00) | 100.00 (75.00) |
| SF36 Bodily pain * median (IQR)       | 84.00 (38.00)  | 74.00 (48.00)  |
| SF36 General health * median (IQR)    | 72.00 (22.00)  | 72.00 (30.00)  |
| SF36 Social functioning* median (IQR) | 100.00 (25.00) | 100.00 (25.00) |
| SF36 Role emotional * median (IQR)    | 100.00 (0.00)  | 100.00 (33.00) |
| SF36 Mental health* median (IQR)      | 80.00 (20.00)  | 80.00 (20.00)  |

|                                                         |               |               |
|---------------------------------------------------------|---------------|---------------|
| SF36 Physical component summary score median (IQR)      | 50.70 (12.20) | 48.95 (15.80) |
| SF36 Mental health component summary score median (IQR) | 55.08 (10.00) | 54.59 (11.71) |
| Stroke events                                           |               |               |

The data presented as mean and (SD) for normally distributed continuous variables, median and interquartile range (IQR) for non-normally distributed variables, and number (N) and percentage (%) for categorical variables.

Table II: Correlation between SF-36 Vitality and SF-36 domains.

| SF-36 domains                                      | N     | Fatigue Quartile      |                        |                       |                      | Spearman rank correlation rho(p value) |
|----------------------------------------------------|-------|-----------------------|------------------------|-----------------------|----------------------|----------------------------------------|
|                                                    |       | Q1 (100-75)           | Q2 (75-66)             | Q3 (65-51)            | Q4 (50-0)            |                                        |
| Physical functioning Median (IQR)                  | 15484 | 95.00 (87.50-102.50)  | 90.00 (82.50-97.50)    | 85.00 (72.50-97.50)   | 75.0 (55.00-95.00)   | 0.454(0.000)                           |
| Role limitations (physical) Median (IQR)           | 15427 | 100(100.00-100.00)    | 100.00 (100.00-100.00) | 100 (75.00-125.00)    | 50.00 (0.00-100.00)  | 0.492(0.000)                           |
| Bodily pain Median (IQR)                           | 15637 | 100.00 (92.00-108.00) | 84.00 (70.00-98.00)    | 74.00 (63.00-85.00)   | 62.00 (45.50-78.50)  | 0.477(0.000)                           |
| General health Median (IQR)                        | 15317 | 85.00 (77.50-92.50)   | 77.00 (69.50-84.50)    | 72.00(62.00-82.00)    | 57.00 (41.00-74.00)  | 0.596 (0.000)                          |
| Social functioning Median (IQR)                    | 15651 | 100.00(100.00-100.00) | 100.00(100.00-100.00)  | 100.00(94.00-106.00)  | 75.00(50.00-100.00)  | 0.547(0.000)                           |
| Emotional Role Median (IQR)                        | 15377 | 100.00(100.00-100.00) | 100.00(100.00-100.00)  | 100.00(100.00-100.00) | 100.00(66.50-133.50) | 0.420 (0.000)                          |
| Mental health Median (IQR)                         | 15633 | 92.00(86.00-98.00)    | 84.00(78.00-90.00)     | 80.00(72.00-88.00)    | 64.00(52.00-76.00)   | 0.633 (0.000)                          |
| Physical component summary score Median (IQR)      | 14925 | 54.20(51.20-57.20)    | 52.40(48.40-56.40)     | 49.50(44.00-55.0)     | 42.90(33.90-51.90)   | 0.458 (0.000)                          |
| Mental health component summary score Median (IQR) | 14925 | 58.93(56.93-62.93)    | 56.58(54.08-59.08)     | 53.85(49.5-57.85)     | 46.30(38.80-53.80)   | 0.643(0.000)                           |

Table III: Cox proportional hazard models (with corresponding 95% confidence intervals) for incident stroke stratified by confounders in the EPIC Norfolk study.

| Characteristic   | Hazard Ratio         | SF-36 vitality score quartiles |                  |                  |                  | P value*   |
|------------------|----------------------|--------------------------------|------------------|------------------|------------------|------------|
|                  |                      | Q1<br>(100-75)                 | Q2<br>(75-66)    | Q3<br>(65-51)    | Q4<br>(50-0)     |            |
| Whole population | Model E HR (95 % CI) | 1.00                           | 1.04 (0.89-1.22) | 1.20 (1.04-1.39) | 1.49 (1.29-1.71) | <0.001     |
|                  | Events/ Population   | 345/267                        | 267/3007         | 400/4077         | 497/4691         | 1509/15654 |
| Smokers          | Model E (95 % CI)    | 1.00                           | 0.99 (0.80-1.23) | 1.23 (1.01-1.48) | 1.44 (1.19-1.74) | <0.001     |
|                  | Events/Population    | 196/1958                       | 145/1520         | 243/2171         | 284/2535         | 868/8184   |
| Never smoker     | Model E (95 % CI)    | 1.00                           | 1.09 (0.85-1.38) | 1.14 (0.91-1.43) | 1.57 (1.27-1.94) | <0.001     |
|                  | Events/Population    | 149/1921                       | 122/1487         | 157/1906         | 213/2156         | 641/7470   |
| Male             | Model E (95 % CI)    | 1.00                           | 1.08 (0.87-1.35) | 1.21 (0.98-1.47) | 1.47 (1.20-1.80) | <0.001     |
|                  | Events/Population    | 192/1935                       | 145/1380         | 190/1770         | 210/1821         | 737/6906   |
| Female           | Model E (95 % CI)    | 1.00                           | 1.00 (0.78-1.27) | 1.20 (0.97-1.48) | 1.49 (1.22-1.82) | <0.001     |
|                  | Events/Population    | 153/1944                       | 122/1627         | 210/2307         | 287/2870         | 772/8748   |
| TSH normal       | Model E (95 % CI)    | 1.00                           | 1.18 (0.92-1.51) | 1.22 (0.97-1.54) | 1.61 (1.30-2.00) | <0.001     |
|                  | Events/Population    | 133/1835                       | 124/1472         | 160/2039         | 223/2341         | 640/7687   |
| TSH high         | Model E (95 % CI)    | 1.00                           | 1.08 (0.52-2.25) | 1.56 (0.81-2.99) | 1.95 (1.02-3.73) | 0.139      |
|                  | Events/Population    | 16/186                         | 15/169           | 26/211           | 34/245           | 91/811     |
| TSH low          | Model E (95 % CI)    | 1.00                           | 0.70 (0.16-3.00) | 1.40 (0.40-5.00) | 3.11 (1.10-9.62) | 0.098      |
|                  | Events/Population    | 6/54                           | 3/46             | 6/58             | 15/80            | 30/238     |
| No Depression    | Model E (95 % CI)    | 1.00                           | 1.02 (0.87-1.20) | 1.20 (1.03-1.38) | 1.43 (1.24-1.65) | <0.001     |
|                  | Events/Population    | 339/3804                       | 256/2926         | 384/3893         | 447/4291         | 1426/14914 |
| Depression       | Model E (95 % CI)    | 1.00                           | 1.96 (0.70-5.48) | 1.11 (0.42-2.96) | 2.60 (1.06-6.31) | 0.020      |
|                  | Events/Population    | 6/75                           | 11/81            | 16/184           | 50/400           | 83/740     |
| No cancer        | Model E (95 % CI)    | 1.00                           | 1.05 (0.90-1.24) | 1.19 (1.03-1.38) | 1.43 (1.24-1.66) | <0.001     |
|                  | Events               | 326/712                        | 255/2858         | 374/3870         | 441/4359         | 1396/14799 |

|                                  |                   |          |                  |                  |                  |            |
|----------------------------------|-------------------|----------|------------------|------------------|------------------|------------|
| Cancer                           | Model E (95 % CI) | 1.00     | 0.87 (0.42-1.82) | 1.43 (0.77-2.64) | 2.29 (1.31-3.99) | 0.003      |
|                                  | Events/Population | 19/167   | 12/149           | 26/207           | 56/332           | 113/855    |
| No COPD**                        | Model E (95 % CI) | 1.00     | 1.02 (0.87-1.21) | 1.19 (1.02-1.38) | 1.48 (1.28-1.72) | <0.001     |
|                                  | Events/Population | 325/3648 | 247/2798         | 364/3667         | 444/4152         | 1380/14265 |
| COPD**                           | Model E (95 % CI) | 1.00     | 1.61 (0.84-3.07) | 1.44 (0.81-2.54) | 1.77 (1.03-3.05) | 0.218      |
|                                  | Events/Population | 20/231   | 20/209           | 36/410           | 53/539           | 129/1389   |
| No Baseline MI†                  | Model E (95 % CI) | 1.00     | 1.03 (0.88-1.22) | 1.20 (1.04-1.40) | 1.46 (1.27-1.69) | <0.001     |
|                                  | Events            | 335/3819 | 255/2940         | 385/3965         | 457/4489         | 1432/15213 |
| MI†                              | Model E (95 % CI) | 1.00     | 0.83 (0.34-2.02) | 0.74 (0.32-1.71) | 1.27 (0.60-2.70) | 0.319      |
|                                  | Events/Population | 10/60    | 12/67            | 15/112           | 40/202           | 77/441     |
| No anaemia                       | Model E (95 % CI) | 1.00     | 0.94 (0.74-1.20) | 1.19 (0.96-1.48) | 1.38 (1.12-1.70) | 0.002      |
|                                  | Events/Population | 149/1857 | 119/1524         | 193/2114         | 239/2480         | 700/7975   |
| Anaemia                          | Model E (95 % CI) | 1.00     | 1.20 (0.85-1.71) | 1.05 (0.74-1.48) | 1.89 (1.39-2.59) | <0.001     |
|                                  | Events/Population | 68/767   | 58/583           | 63/768           | 106/844          | 295/2962   |
| General health excellent or good | Model E (95 % CI) | 1.00     | 1.06 (0.88-1.27) | 1.19 (1.01-1.42) | 1.36 (1.13-1.63) | 0.007      |
|                                  | Events/Population | 268/3180 | 205/2367         | 269/2869         | 210/2281         | 952/10697  |
| General health moderate or poor  | Model E (95 % CI) | 1.00     | 0.93 (0.47-1.86) | 0.88 (0.49-1.61) | 0.95 (0.55-1.66) | 0.964      |
|                                  | Events/Population | 14/114   | 20/166           | 58/486           | 160/1412         | 252/2178   |

\* P test for trend across vitality quartiles. \*\*COPD: Chronic Obstructive Pulmonary Disease. † MI: Myocardial Infarction
